# Supplementary material
Source: MDPI journal article supplement (https://www.mdpi.com/2073-4441/12/4/1198)
Supplement: s1 [file s1]

## Methods

### 1. Mann-Kendall test and Sen's slope estimator– trend detection

The non-parametric Mann-Kendall test is widely used in detecting trends of variables in meteorology and hydrology fields [1–3]. Statistic S can be obtained by Eq.(1).

$$S = \sum_{k=1}^{n-1} \sum_{j=k+1}^n \text{sgn}(x_j - x_k) \quad (1)$$

$$\text{sgn}(x_j - x_k) = \begin{cases} +1, & \text{if } (x_j - x_k) > 0 \\ 0, & \text{if } (x_j - x_k) = 0 \\ -1, & \text{if } (x_j - x_k) < 0 \end{cases} \quad (2)$$

where n is the length of the sample,  $x_k$  and  $x_j$  are from  $k=1, 2, \dots, n-1$  and  $j=k+1, \dots, n$ . If n is bigger than 8, statistic S approximates to normal distribution. The mean of S is 0 and the variance of S can be acquired as follows:

$$\text{var}(S) = \frac{n(n-1)(2n+5)}{18} \quad (3)$$

Then the test statistic Z is denoted by Eq.(4).

$$Z = \begin{cases} \frac{S-1}{\sqrt{\text{var}(S)}}, & \text{if } S > 0 \\ 0, & \text{if } S = 0 \\ \frac{S+1}{\sqrt{\text{var}(S)}}, & \text{if } S < 0 \end{cases} \quad (4)$$

If  $Z > 0$ , it indicates an increasing trend, and vice versa. Given a confidence level  $\alpha$ , the sequential data would be supposed to experience statistically significant trend if  $|Z| > Z(1-\alpha/2)$ , where  $Z(1-\alpha/2)$  is the corresponding value of  $P=\alpha/2$  following the standard normal distribution. In this study, 0.05 and 0.01 confidence levels were used.

Besides, the magnitude of a time series trend was evaluated by a simple non-parametric procedure developed by Sen [4]. The trend is calculated by

$$\beta = \text{Median}\left(\frac{x_j - x_i}{j - i}\right), \quad j > i \quad (5)$$

where  $\beta$  is Sen's slope estimate.  $\beta > 0$  indicates upward trend in a time series. Otherwise the data series presents downward trend during the time period.

### 2. Mann-Kendall test - mutation detection

Mann-Kendall test can also be used to detect the abrupt changes of climate and hydrological data [5–8]. First, building an order serial  $S_k$ :

$$S_k = \sum_{i=1}^k \sum_{j=i+1}^n a_{ij} \quad (k = 2, 3, \dots, n) \quad (6)$$

where  $a_{ij} = 1$  when  $x_i > x_j$ ;  $a_{ij} = 0$  when  $x_i \leq x_j$ .

Test statistic can be expressed as:

$$UF_k = [S_k - E(S_k)]/[Var(S_k)] \quad (k = 1, 2, \dots, n) \quad (7)$$

where  $E(S_k) = n(n - 1/4)$ ;  $Var(S_k) = n(n - 1)(2n + 5)/72$ .  $UF_k$  is the forward sequence and follows the normal distribution.  $UB_k$  can then be denoted by reversing the series of data based on the same equation.

The null hypothesis (no abrupt change point) will be rejected if the  $UF_k$  values are greater than the confidence interval, and the approximate time of occurrence of the change point can be located according to the intersection between  $UF_k$  and  $UB_k$  within the confidence interval. If the intersection is outside the confidence interval, we need to employ another method (a moving t-test technique was used for this study) to analyze the stationarity of hydrometeorological data again.

### 3. Moving t-test technique

The moving t-test technique was adopted to detect change point by evaluating significant difference between two samples, and has been extensively used [2,9]. This method divides one random variable into two consecutive subsets  $x_1$  and  $x_2$ , where  $u_i$ ,  $s_i^2$  and  $n_i$  represent the mean value, variance and sample size of  $x_i$  ( $i = 1, 2$ ), respectively. The procedures are as follows:

Null hypothesis:  $H_0: u_1 - u_2 = 0$ . Statistic  $t_0$  is defined by Equation (8).

$$t_0 = \frac{\bar{x}_1 - \bar{x}_2}{s_p(1/n_1 + 1/n_2)^{1/2}} \quad (8)$$

where  $s_p$  is:

$$s_p = \sqrt{\frac{n_1 s_1^2 + n_2 s_2^2}{n_1 + n_2 - 2}} \quad (9)$$

$t_0$  complies with the t-distribution with degree of freedom  $v = n_1 + n_2 - 2$ . The null hypothesis would be rejected once  $|t_0| \geq t_\alpha$  at a significant level  $\alpha$ . It means that there is an abrupt change in the sample series. Because different choice of the subsets length can affect the location of turning point, a typical significant level of 0.05 and two conditions  $n_1 = n_2 = 10$  and  $n_1 = n_2 = 15$  were chosen in this study.

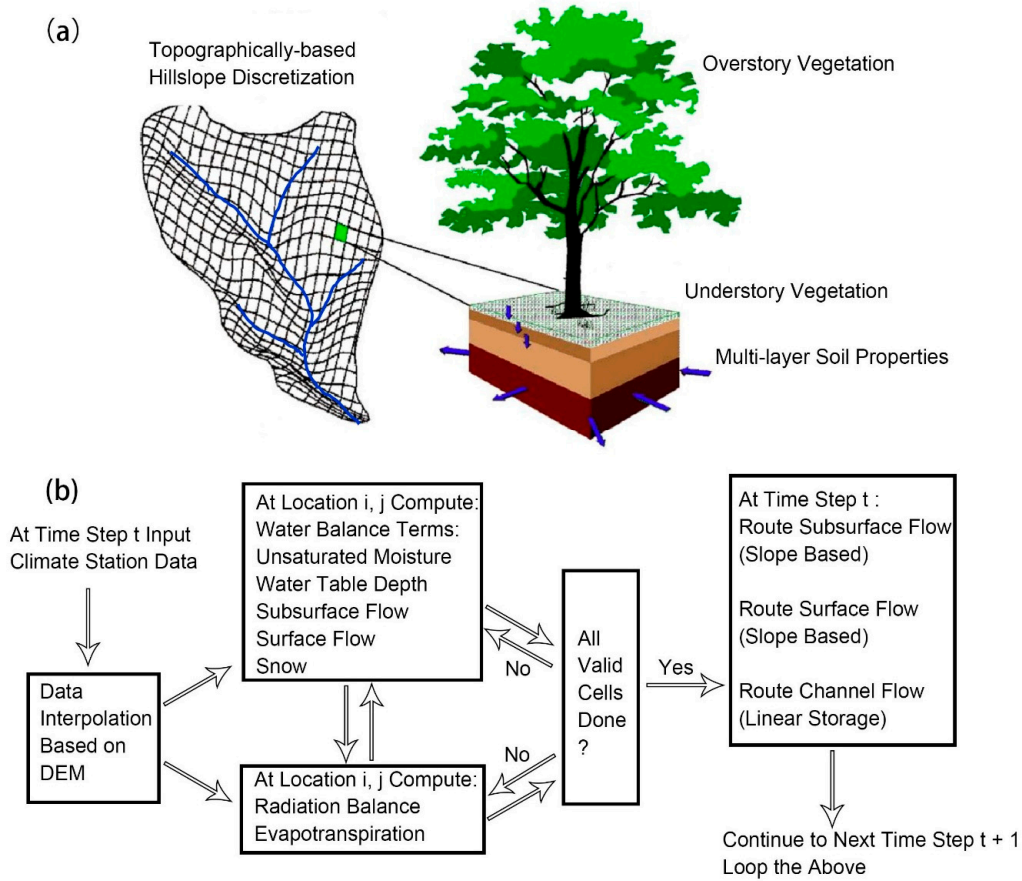

**Figure S1.** Conceptual representation (a) and flow chart (b) of DHSVM. (Flow chart is from [10]).

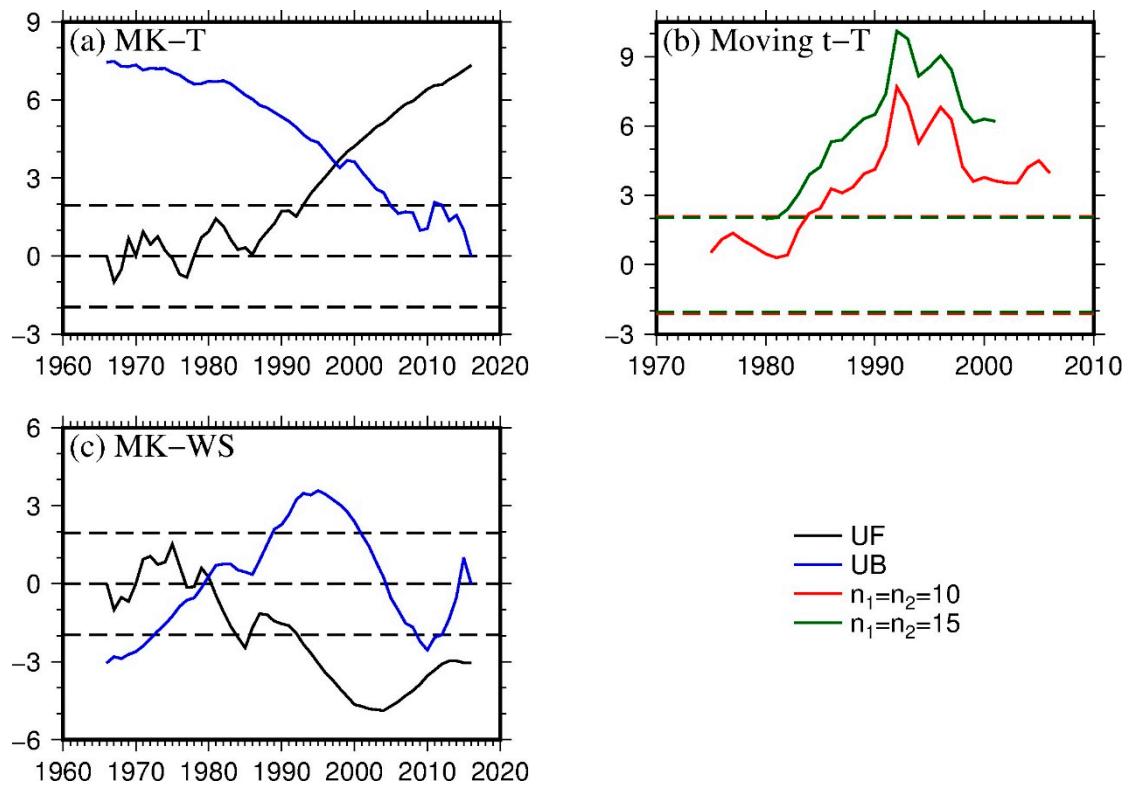

**Figure S2.** Change-point detection of annual data. Mann-Kendall test on annual temperature at DT (T, a), moving t-test technique applied to annual temperature at DT (T, b), Mann-Kendall test on annual wind speed at DT (WS, c).

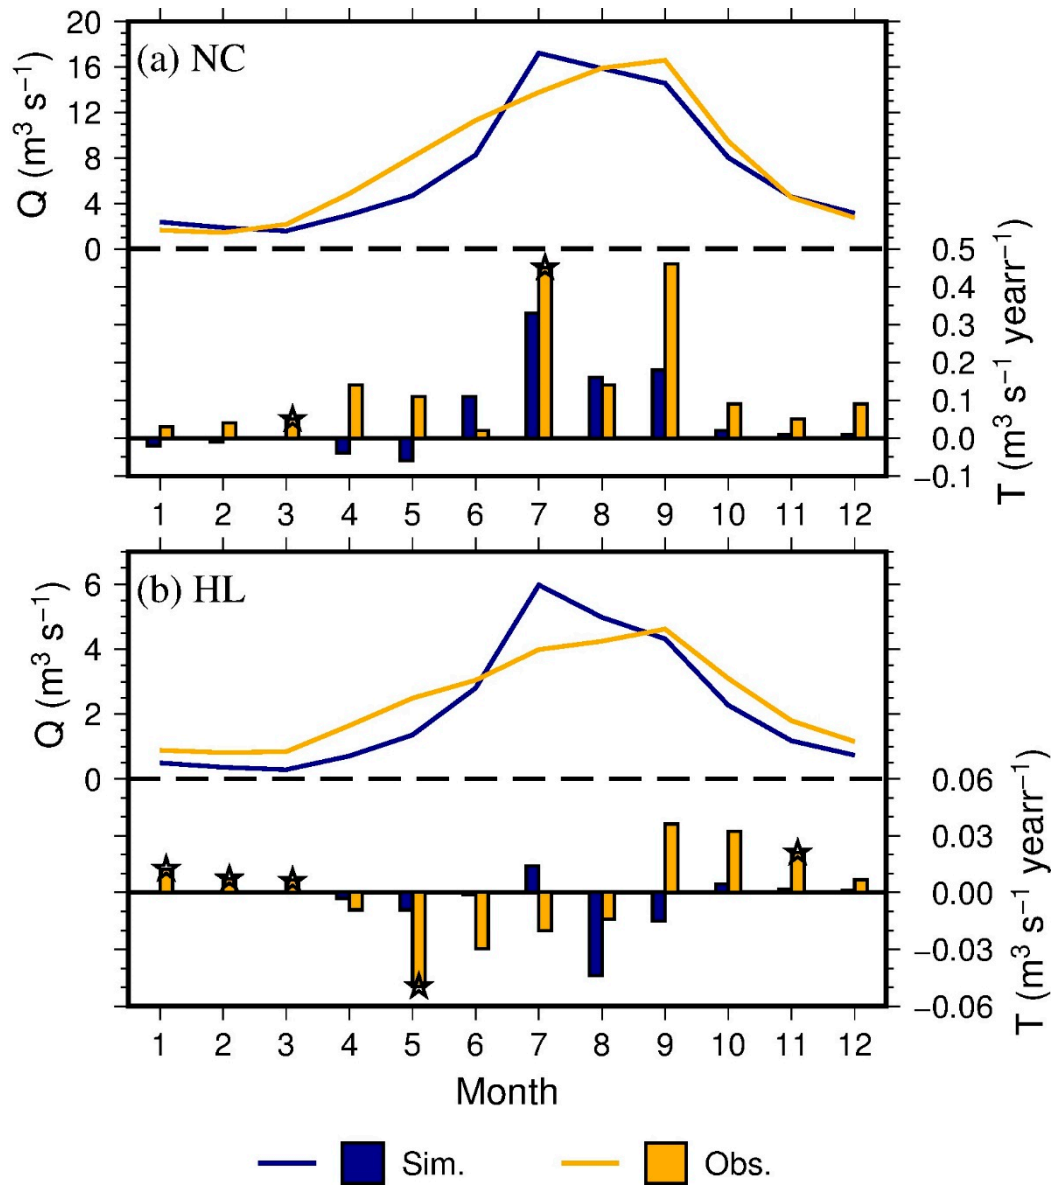

**Figure S3.** Means and trends of monthly streamflow for simulation and observation at NC (2002-2016) and HL (1981-2016).

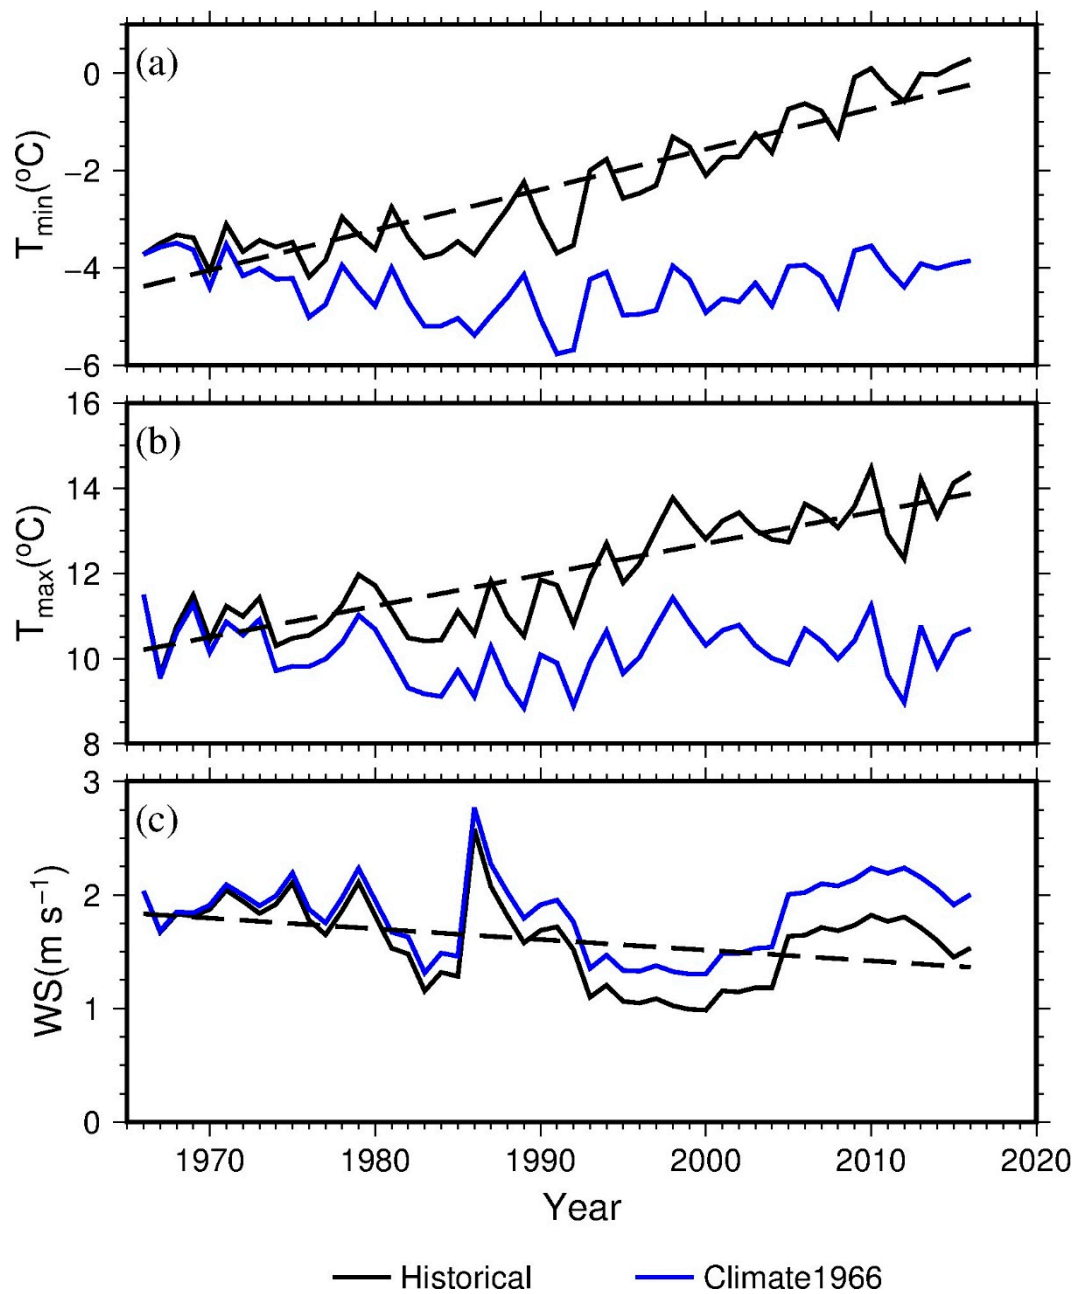

**Figure S4.** Minimum and maximum temperature, wind speed for historical period 1966-2016 and climate 1966 for Datong station.

**Table S1.** Transition matrix of land use in the Beichuan River Basin from 1980 to 2000 (km<sup>2</sup>).

| Land Use Types |                  | 2000     |                  |                  |           |          |             |                 | Total   |
|----------------|------------------|----------|------------------|------------------|-----------|----------|-------------|-----------------|---------|
|                |                  | Woodland | Wooded Grassland | Closed Shrubland | Grassland | Cropland | Bare Ground | Urban and Built |         |
| 1980           | Woodland         | 102.04   | 0.69             | 1.25             | 8.95      | 3.86     |             | 0.19            | 117.04  |
|                | Wooded grassland | 0.28     | 98.58            | 1.25             | 12.24     | 1.82     | 0.02        | 0.59            | 114.82  |
|                | Closed shrubland | 0.85     | 1.32             | 542.94           | 69.01     | 5.61     | 0.40        | 0.07            | 620.59  |
|                | Grassland        | 5.52     | 7.81             | 42.62            | 1254.50   | 26.46    | 29.88       | 5.20            | 1372.04 |
|                | Cropland         | 5.06     | 2.66             | 5.76             | 38.03     | 289.51   |             | 15.44           | 358.52  |
|                | Bare ground      |          |                  | 0.41             | 32.74     |          | 165.70      |                 | 198.85  |
|                | Urban and built  | 0.12     | 0.05             | 0.04             | 2.09      | 4.29     |             | 19.86           | 26.44   |
|                | Water            |          | 0.06             |                  |           | 1.60     |             | 0.29            | 3.29    |
|                | Total            | 113.87   | 111.17           | 594.26           | 1417.56   | 333.15   | 196.01      | 41.65           | 2811.59 |

**Table S2.** Transition matrix of land use in the Beichuan River Basin from 2000 to 2015 (km<sup>2</sup>).

| Land Use Types |                  | 2015     |                  |                  |           |          |             |                 | Total   |
|----------------|------------------|----------|------------------|------------------|-----------|----------|-------------|-----------------|---------|
|                |                  | Woodland | Wooded Grassland | Closed Shrubland | Grassland | Cropland | Bare Ground | Urban and Built |         |
| 2000           | Woodland         | 113.57   |                  | 0.02             | 0.03      |          |             | 0.03            | 113.87  |
|                | Wooded grassland |          | 111.13           |                  |           | 0.01     |             | 0.02            | 111.17  |
|                | Closed shrubland | 0.79     |                  | 591.10           | 1.50      | 0.20     |             |                 | 594.26  |
|                | Grassland        | 1.04     | 0.13             | 0.01             | 1415.70   | 0.06     | 0.02        | 0.11            | 1417.55 |
|                | Cropland         |          | 0.01             | 0.14             | 0.10      | 326.83   |             | 3.17            | 333.15  |
|                | Bare ground      |          |                  |                  | 6.61      |          | 189.40      |                 | 196.01  |
|                | Urban and built  | 0.01     | 0.04             |                  | 0.02      | 0.10     |             | 41.48           | 41.65   |
|                | Water            | 0.01     |                  | 0.04             |           | 0.02     |             | 0.02            | 3.92    |
|                | Total            | 115.42   | 111.31           | 591.30           | 1423.97   | 327.22   | 189.42      | 44.83           | 2811.59 |

## References

- Ahn, K.H.; Merwade, V. Quantifying the relative impact of climate and human activities on streamflow. *J. Hydrol.* **2014**, *515*, 257-266.
- Liang, L.; Li, L.; Liu, Q. Temporal variation of reference evapotranspiration during 1961–2005 in the Taoer River basin of Northeast China. *Agr. Forest Meteorol.* **2010**, *150*, 298-306.
- Wang, X.; He, K.; Dong, Z. Effects of climate change and human activities on runoff in the Beichuan River Basin in the northeastern Tibetan Plateau, China. *Catena* **2019**, *176*, 81-93.
- Sen, P.K.J.J.o.t.A.s.a. Estimates of the regression coefficient based on Kendall's tau. *J. Am. Stat. Assoc.* **1968**, *63*, 1379-1389.
- Li, L.-J.; Zhang, L.; Wang, H.; Wang, J.; Yang, J.-W.; Jiang, D.-J.; Li, J.-Y.; Qin, D.-Y. Assessing the impact of climate variability and human activities on streamflow from the Wuding River basin in China. *Hydrol. Process.* **2007**, *21*, 3485-3491.
- Tian, F.; Yang, Y.H.; Han, S.M. Using runoff slope-break to determine dominate factors of runoff decline in Hutuo River Basin, North China. *Water Sci. Technol.* **2009**, *60*, 2135-2144.
- Ye, X.; Zhang, Q.; Liu, J.; Li, X.; Xu, C.Y. Distinguishing the relative impacts of climate change and human activities on variation of streamflow in the Poyang Lake catchment, China. *J. Hydrol.* **2013**, *494*, 83-95.
- Zhang, X.; Li, P.; Li, D. Spatiotemporal Variations of Precipitation in the Southern Part of the Heihe River Basin (China), 1984–2014. *Water* **2018**, *10*, 410.
- Zhao, Y.; Zou, X.; Cao, L.; Yao, Y.; Fu, G. Spatiotemporal variations of potential evapotranspiration and aridity index in relation to influencing factors over Southwest China during 1960–2013. *Theor. Appl. Climatol.* **2017**, *133*, 711-726.
- Cuo, L.; Giambelluca, T.W.; Ziegler, A.D. Lumped parameter sensitivity analysis of a distributed hydrological model within tropical and temperate catchments. *Hydrol. Process.* **2011**, *25*, 2405-2421.
